# Supplementary material
Source: MDPI journal article supplement (https://www.mdpi.com/2073-4344/13/1/3)
Supplement: s1 [file s1]

# Characterization of Ni-phases and their transformations in Fluid Catalytic Cracking (FCC) catalysts: Comparison of conventional versus boron-based Ni-passivation

Ioannis D. Charisteidis<sup>1</sup>, Pantelis N. Trikalitis<sup>2</sup>, Konstantinos S. Triantafyllidis<sup>1,\*</sup>, Vasileios Komvokis<sup>3,\*</sup>, Bilge Yilmaz<sup>3,\*</sup>

<sup>1</sup>Department of Chemistry, Aristotle University of Thessaloniki, Thessaloniki, Greece

<sup>2</sup>Department of Chemistry, University of Crete, Voutes, 71003 Heraklion, Greece

<sup>3</sup>BASF Corporation, 25 Middlesex/Essex Turnpike, Iselin, NJ 08830, USA;

\* Corresponding authors: [ktrianta@chem.auth.gr](mailto:ktrianta@chem.auth.gr); [vasileios.komvokis@basf.com](mailto:vasileios.komvokis@basf.com); [bilge.yilmaz@basf.com](mailto:bilge.yilmaz@basf.com)

## SUPPLEMENTARY MATERIALS

### PXRD patterns

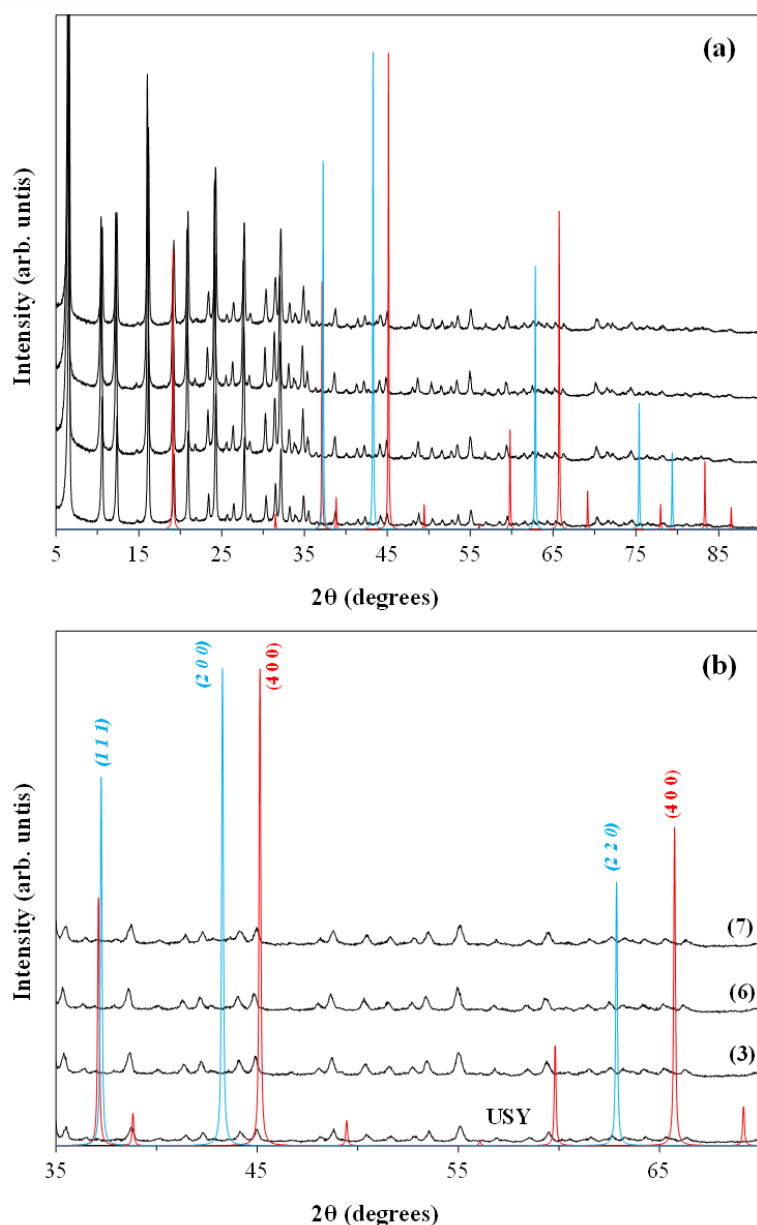

**Figure S1.** (a) PXRD patterns of USY-CH-Ni-oc-X samples, prepared via impregnation of USY zeolite with Ni octanoate solution diluted in cyclohexane (see experimental section); X : (3) 5000 ppm Ni, (6) 20000 ppm Ni, (7) 50000 ppm Ni, and (b) Enlarged view in the range 35-70° 2θ. The patterns of NiO (blue pattern) and NiAl<sub>2</sub>O<sub>4</sub> (red pattern) are also shown for comparison.

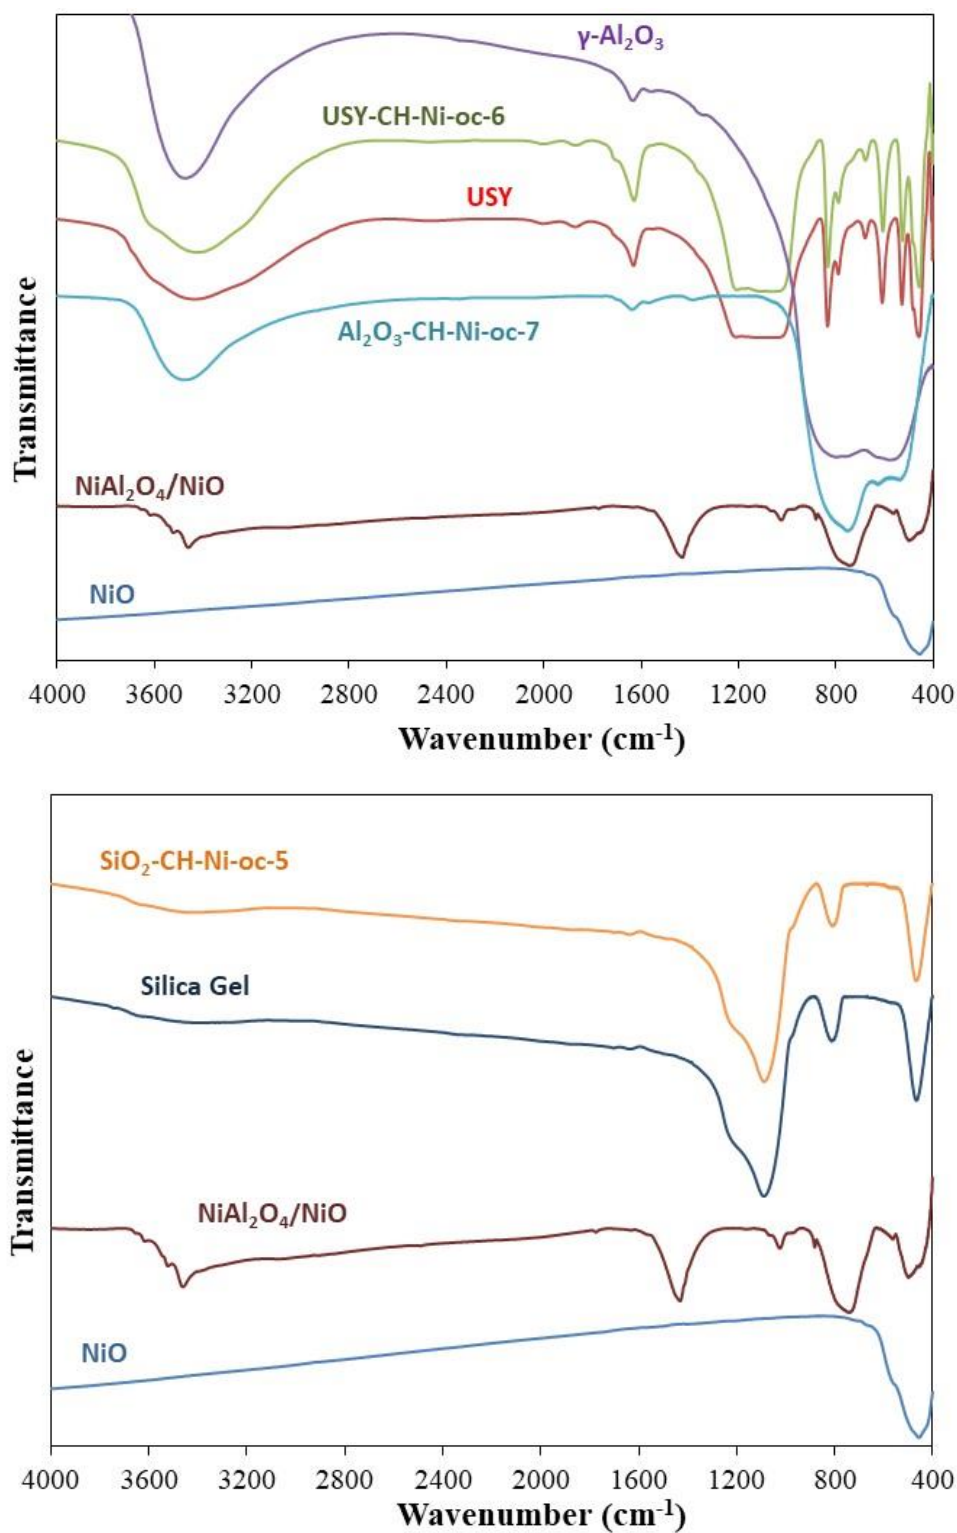

**Figure S2.** FTIR spectra of representative Ni-impregnated materials: SiO<sub>2</sub>-CH-Ni-oc-5 (1.5 wt.% Ni), Al<sub>2</sub>O<sub>3</sub>-CH-Ni-oc-7 (10 wt.% Ni), USY-CH-Ni-oc-6 (2 wt.% Ni). The spectra of bulk NiO, NiAl<sub>2</sub>O<sub>4</sub>/NiO, silica gel,  $\gamma$ -Al<sub>2</sub>O<sub>3</sub> and USY zeolite, are also included for comparison.

### SEM images and point EDS microanalysis

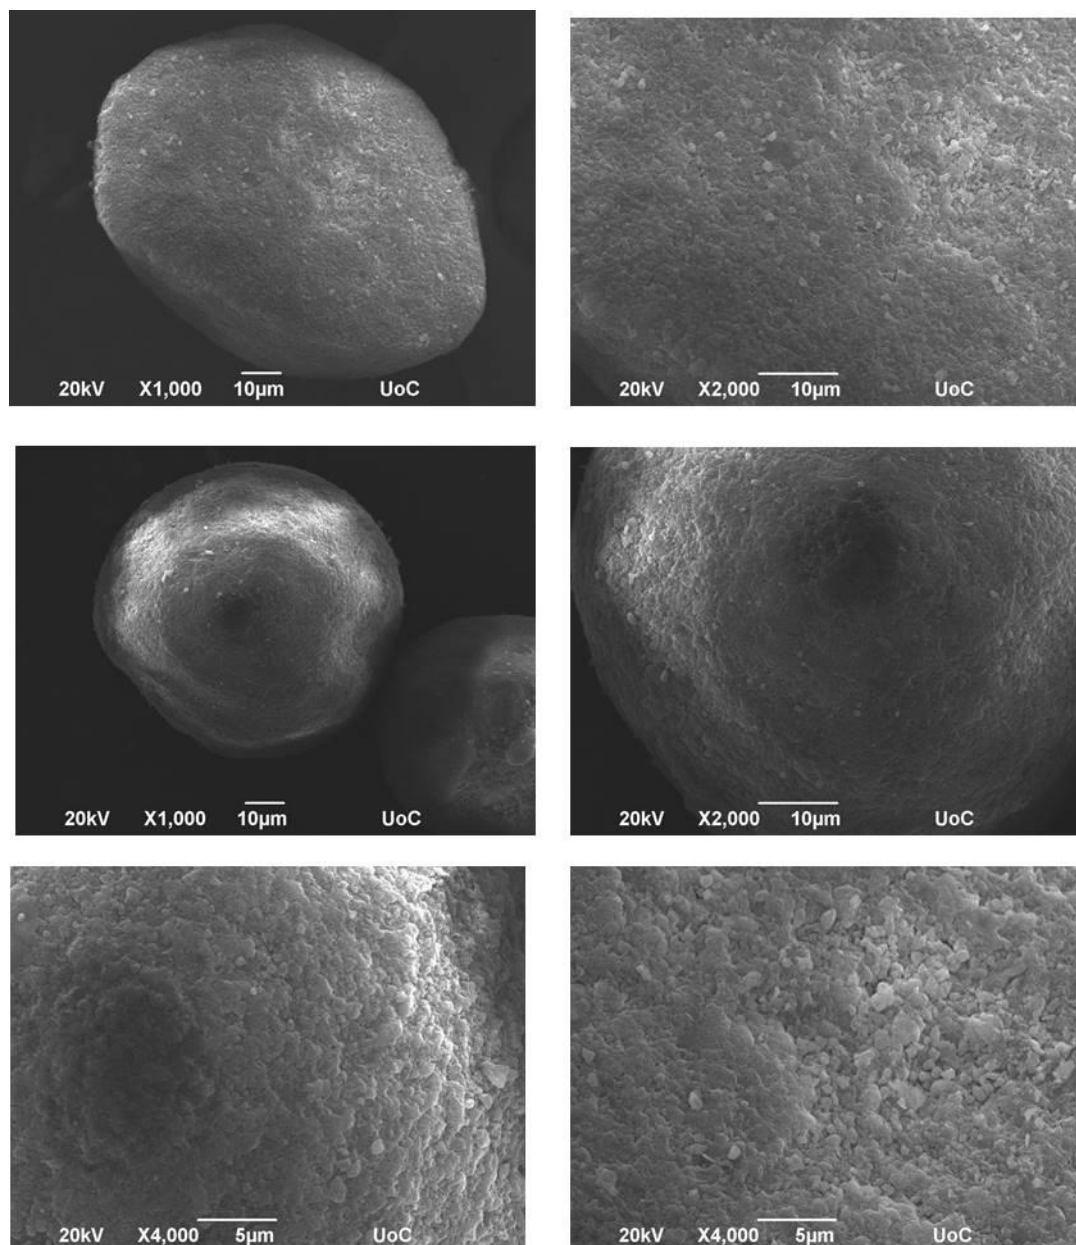

| Element | Atomic (%), average value | Range       |
|---------|---------------------------|-------------|
| Al K    | 37.3                      | 33.4 – 43.4 |
| Si K    | 60.9                      | 55.7 – 65.1 |
| Ni K    | 0.8                       | 0.4 – 1.2   |
| La L    | 0.7                       | 0.2 – 1.1   |

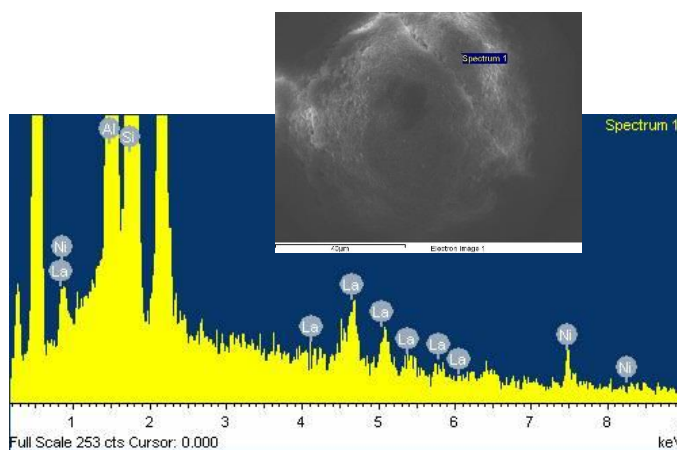

**Figure S3.** Representative SEM images and point EDS microanalysis data of Ni-loaded FCC catalyst: BLF-CAT-4 with 10,000 ppm Ni

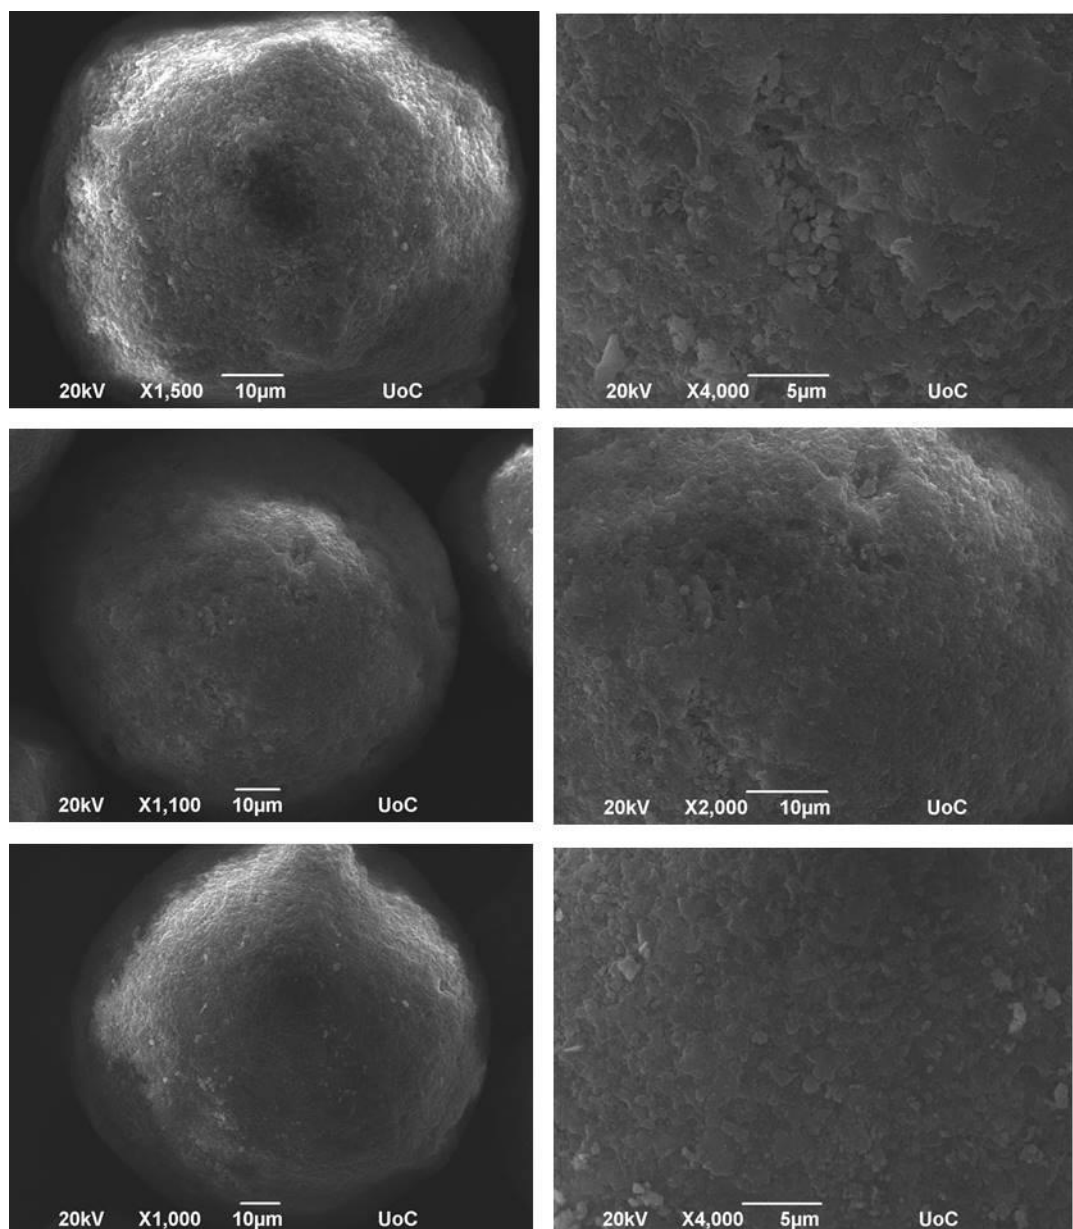

| Element | Atomic (%), average value | Range       |
|---------|---------------------------|-------------|
| Al K    | 36.2                      | 35.3 – 37.7 |
| Si K    | 61.6                      | 59.7 – 62.9 |
| Ni K    | 1.0                       | 0.7 – 1.2   |
| La L    | 1.2                       | 1.0 – 1.6   |

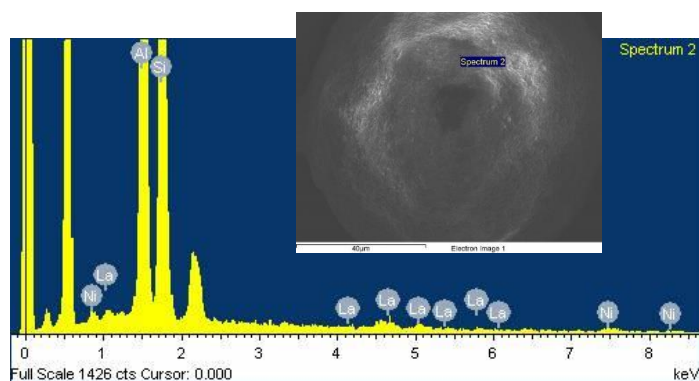

**Figure S4.** Representative SEM images and point EDS microanalysis data of Ni-loaded FCC catalyst: BLB-CAT-4 (containing also boron) with 10,000 ppm Ni



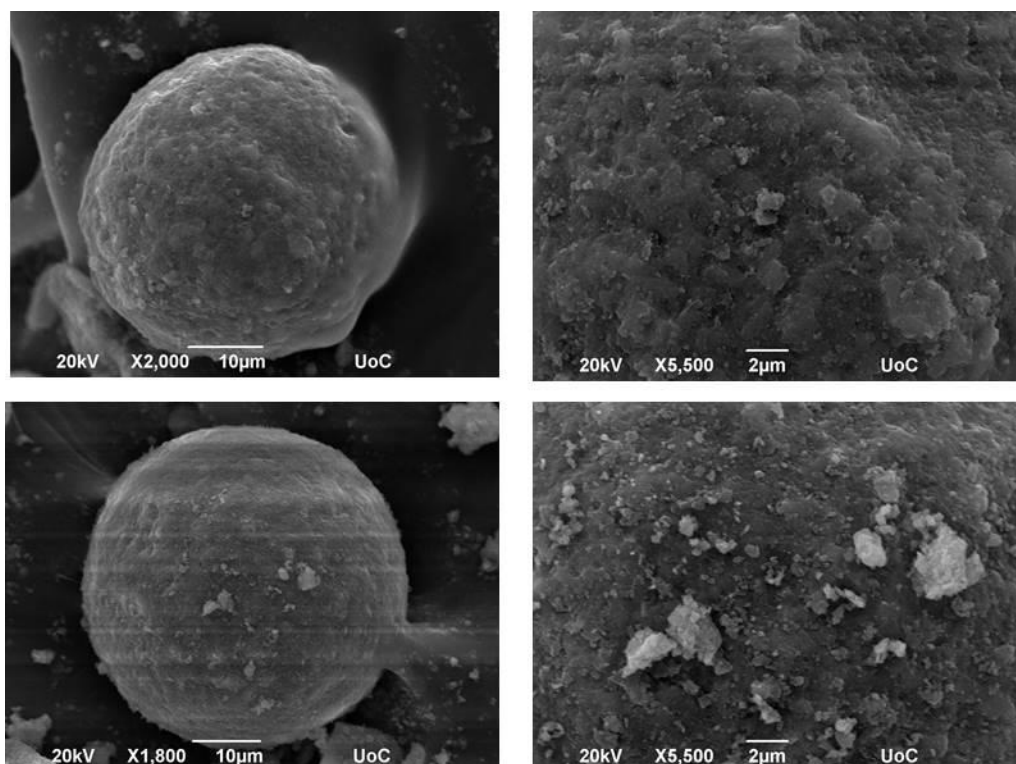

| Element | Atomic (%),<br>average value | Range       |
|---------|------------------------------|-------------|
| Al K    | 36.8                         | 34.1 – 40.3 |
| Si K    | 63.3                         | 53.9 – 78.6 |
| Ca K    | 2.5                          | 1.4 – 5.8   |
| Ti K    | 2.8                          | 2.8         |
| V K     | 0.6                          | 0.6         |
| Fe K    | 1.2                          | 0.7 – 2.5   |
| Ni K    | 0.7                          | 0.3 – 1.3   |
| La K    | 1.4                          | 0.5 – 2.6   |
| Mg K    | 3.1                          | 1.3 – 6.3   |

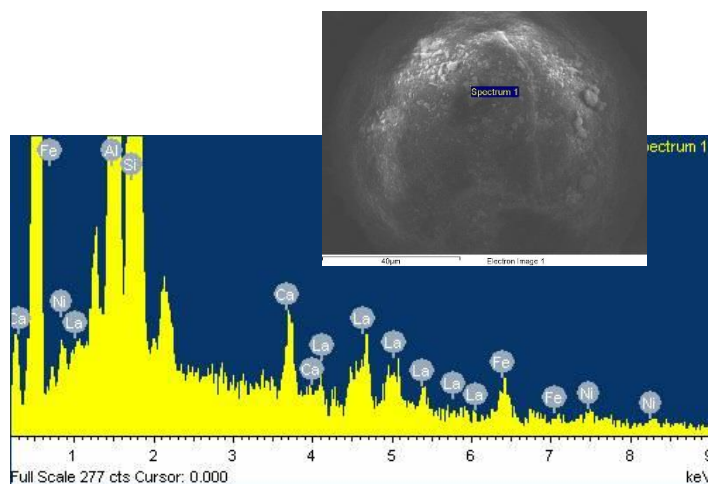

**Figure S5.** Representative SEM images and point EDS microanalysis data of equilibrium FCC catalyst: B-CAT-2M (4327 ppm Ni)

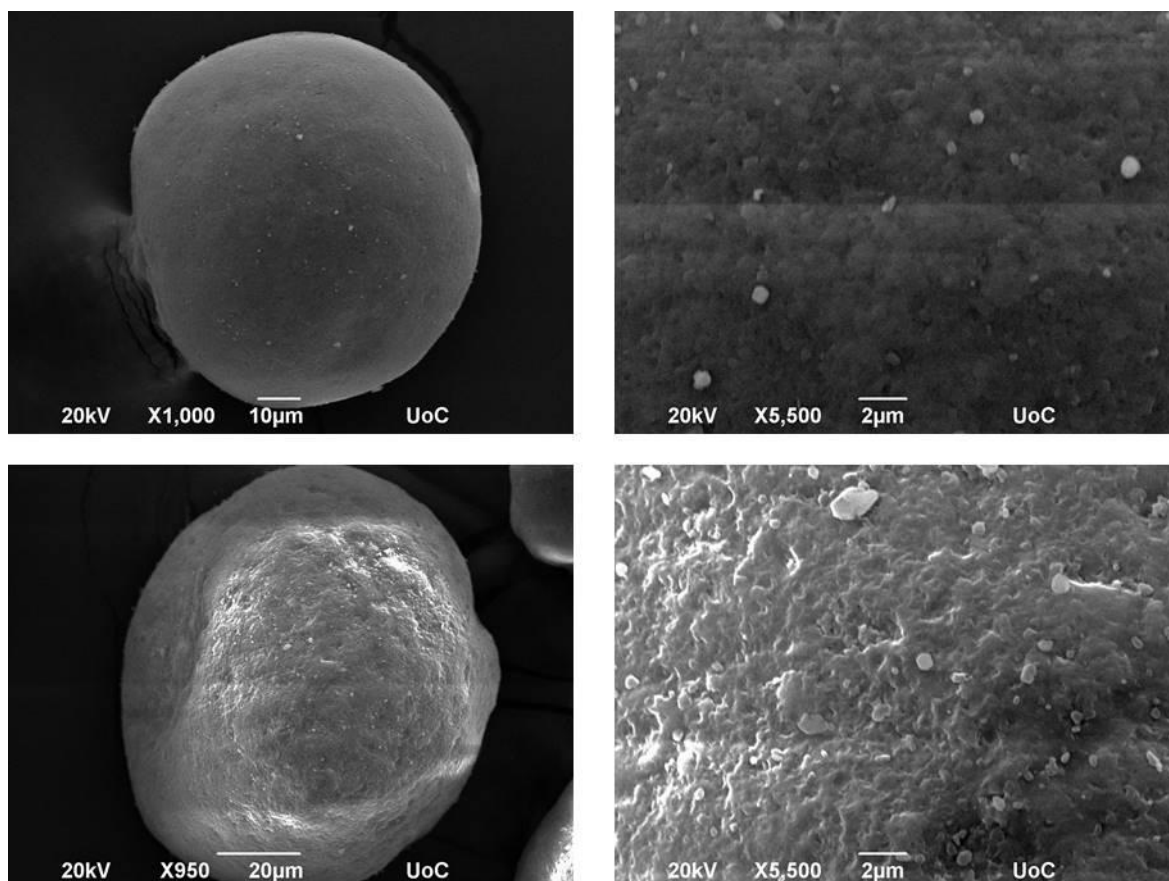

| Element | Atomic (%), average value | Range       |
|---------|---------------------------|-------------|
| Al K    | 33.2                      | 32.7 – 33.5 |
| Si K    | 61.0                      | 59.1 – 63.8 |
| Ca K    | 0.5                       | 0.5         |
| Ti K    | 1.4                       | 1.1 – 1.8   |
| Fe K    | 1.4                       | 1.3 – 1.4   |
| Ni K    | 0.5                       | 0.3 – 0.8   |
| La K    | 0.4                       | 0.1 – 0.7   |
| Mg K    | 0.9                       | 0.9         |

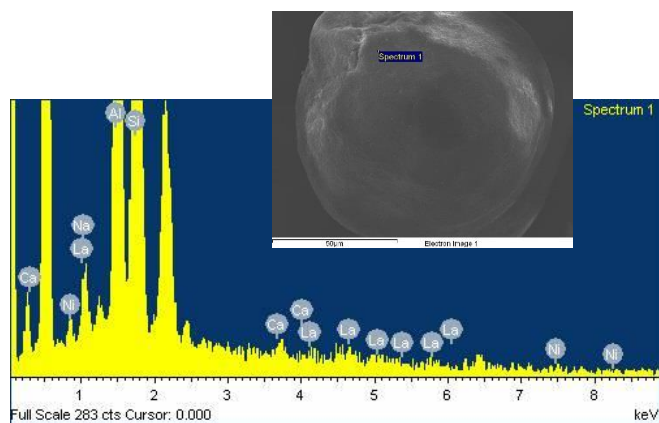

**Figure S6.** Representative SEM images and point EDS microanalysis data of equilibrium FCC catalyst: B-CAT-5M (5141 ppm Ni)

EDS elemental mapping of flat cross-sections

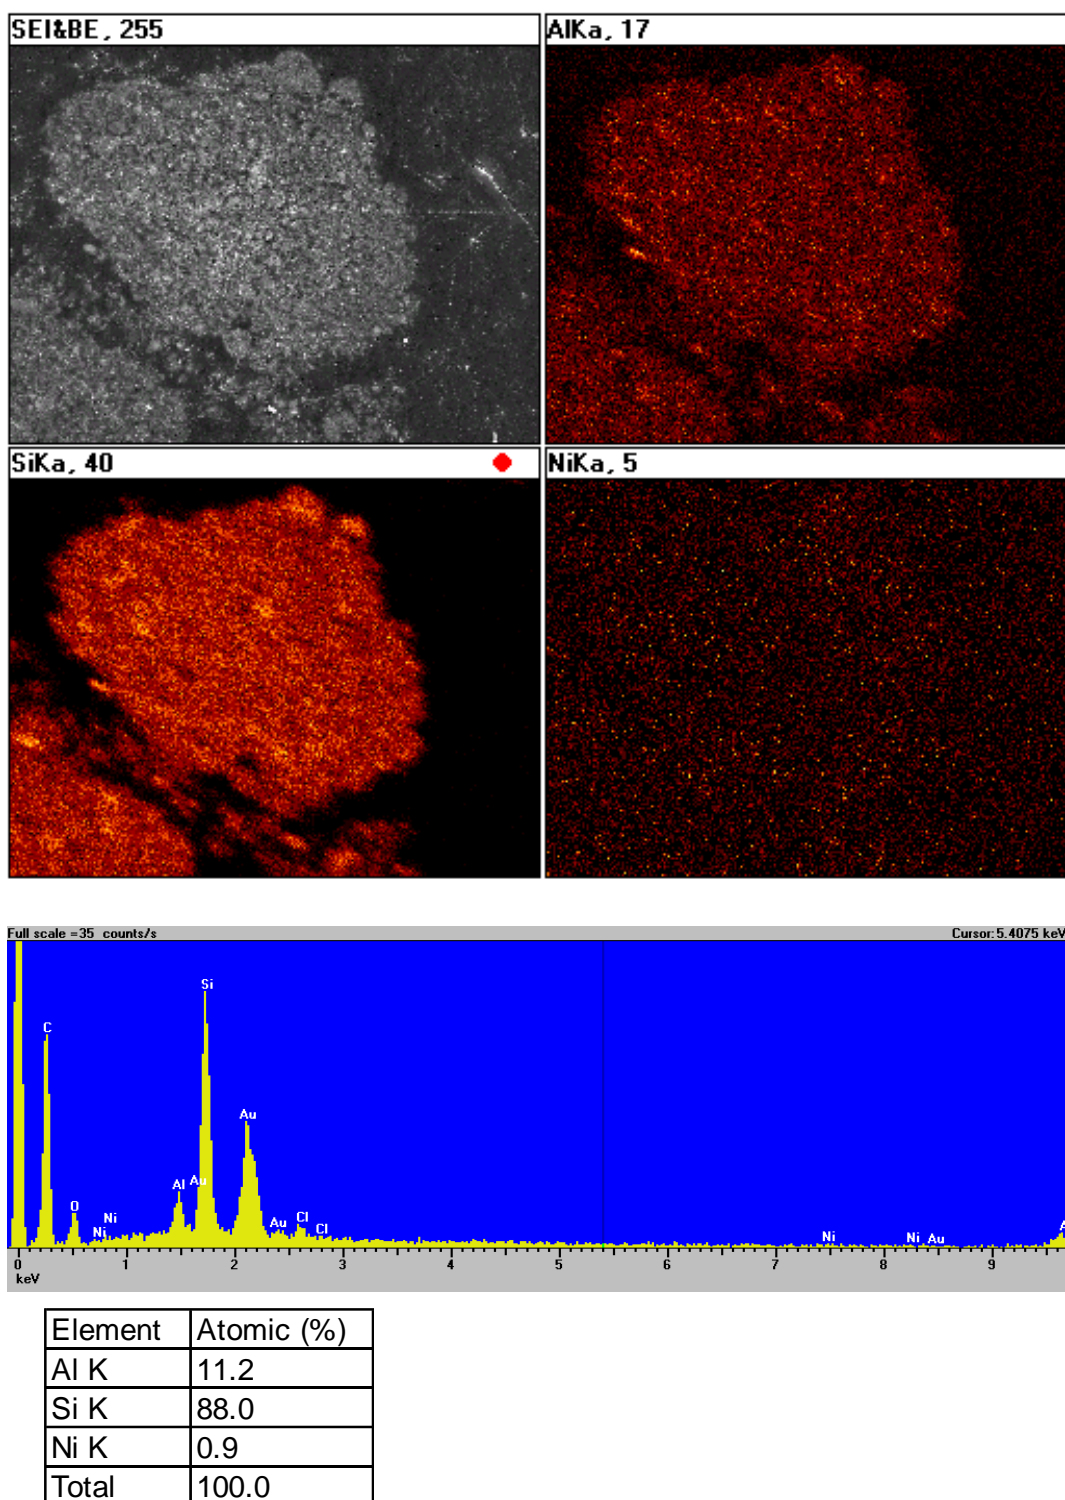

**Figure S7.** SEM image and EDS elemental mapping of representative Ni-impregnated USY zeolite sample: USY-CH-Ni-oc-4 (10,000 ppm Ni)



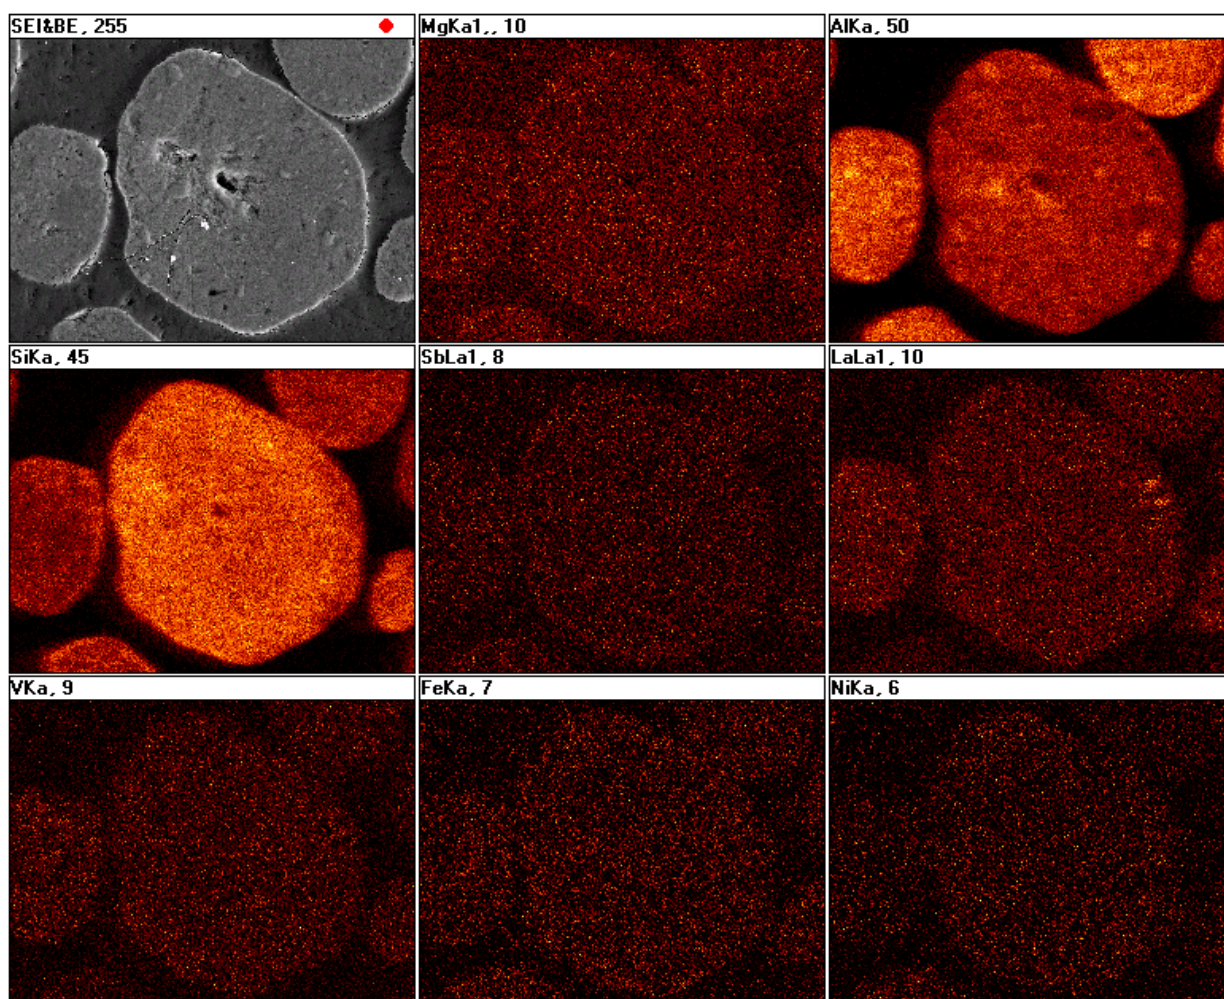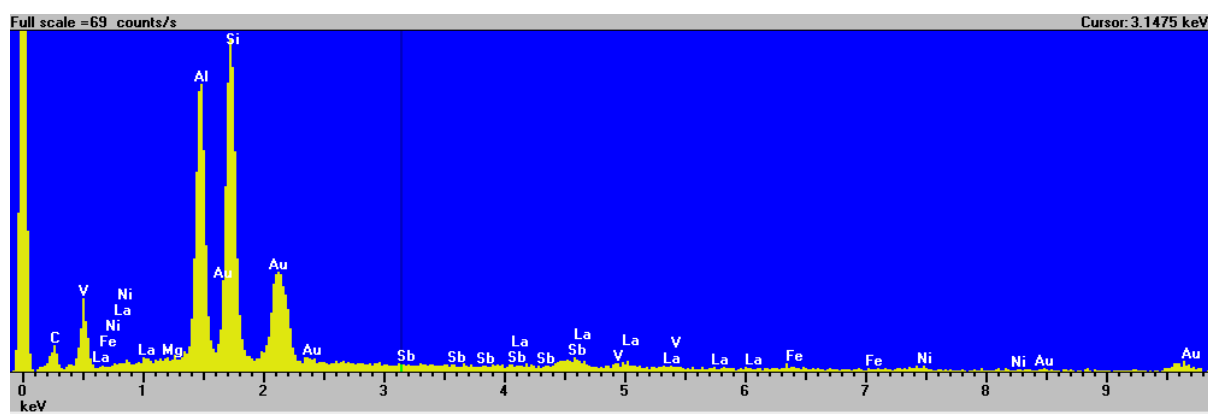

| Element | Atomic (%) |
|---------|------------|
| Mg K    | 0.4        |
| Al K    | 34.6       |
| Si K    | 61.6       |
| V K     | 0.1        |
| Fe K    | 0.1        |
| Ni K    | 2.7        |
| Sb L    | 0.1        |
| La L    | 0.4        |
| Total   | 100        |

**Figure S8.** SEM image and EDS elemental mapping of representative Ni-loaded FCC catalyst: BLF-CAT-4 with 10,000 ppm Ni



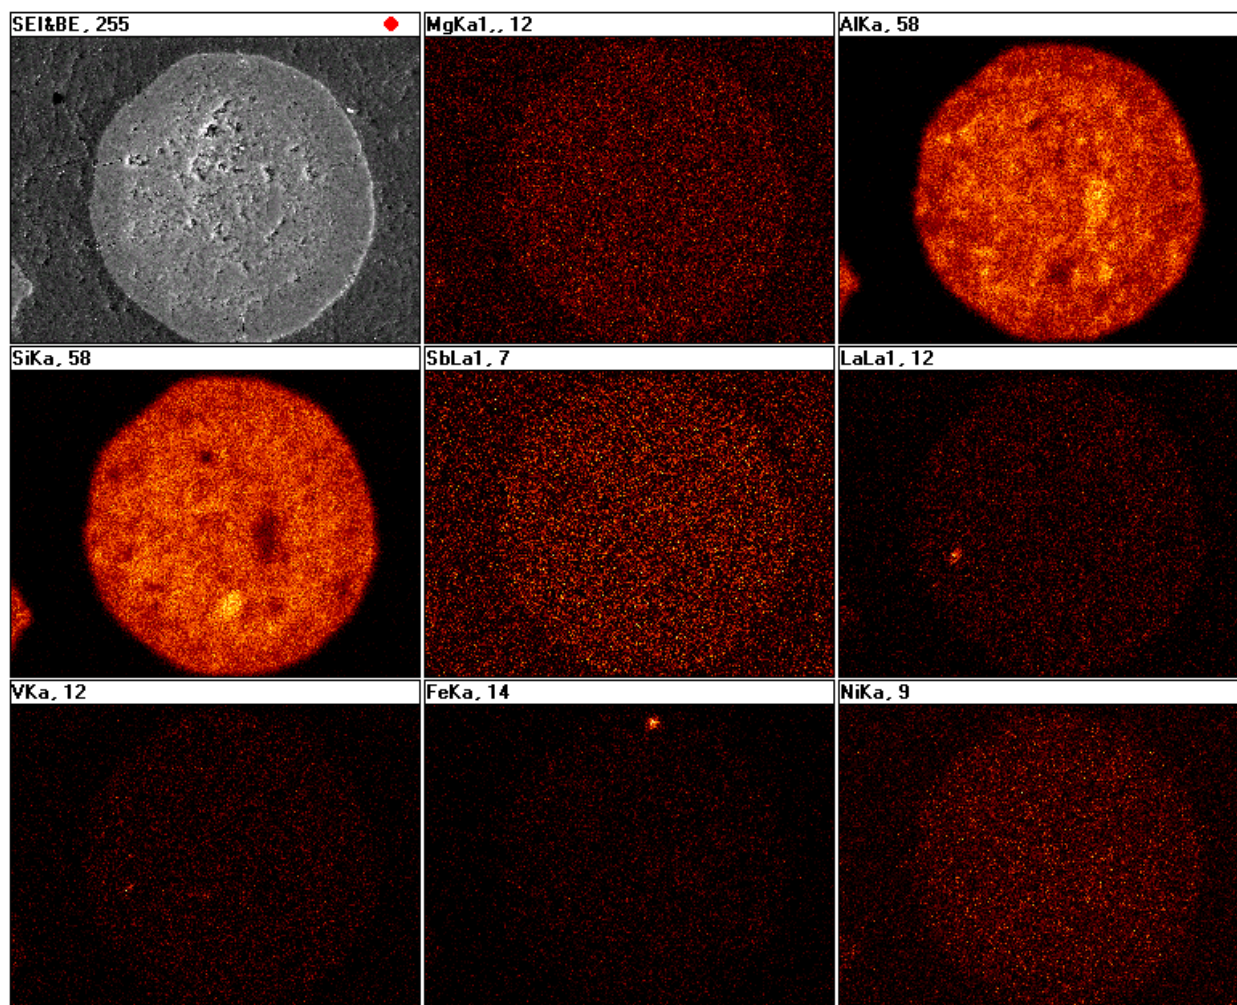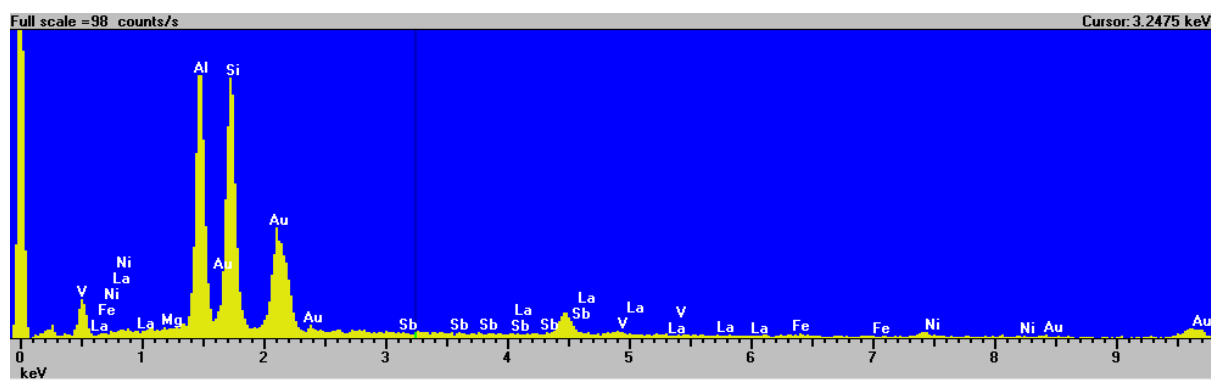

| Element | Atomic (%) |
|---------|------------|
| Mg K    | 0.1        |
| Al K    | 35.1       |
| Si K    | 61.1       |
| V K     | 0.2        |
| Fe K    | 0.8        |
| Ni K    | 2.5        |
| Sb L    | 0.1        |
| La L    | 0.1        |
| Total   | 100        |

**Figure S9.** SEM image and EDS elemental mapping of representative Ni-loaded FCC catalyst: BLB-CAT-4 (containing boron) with 10,000 ppm Ni

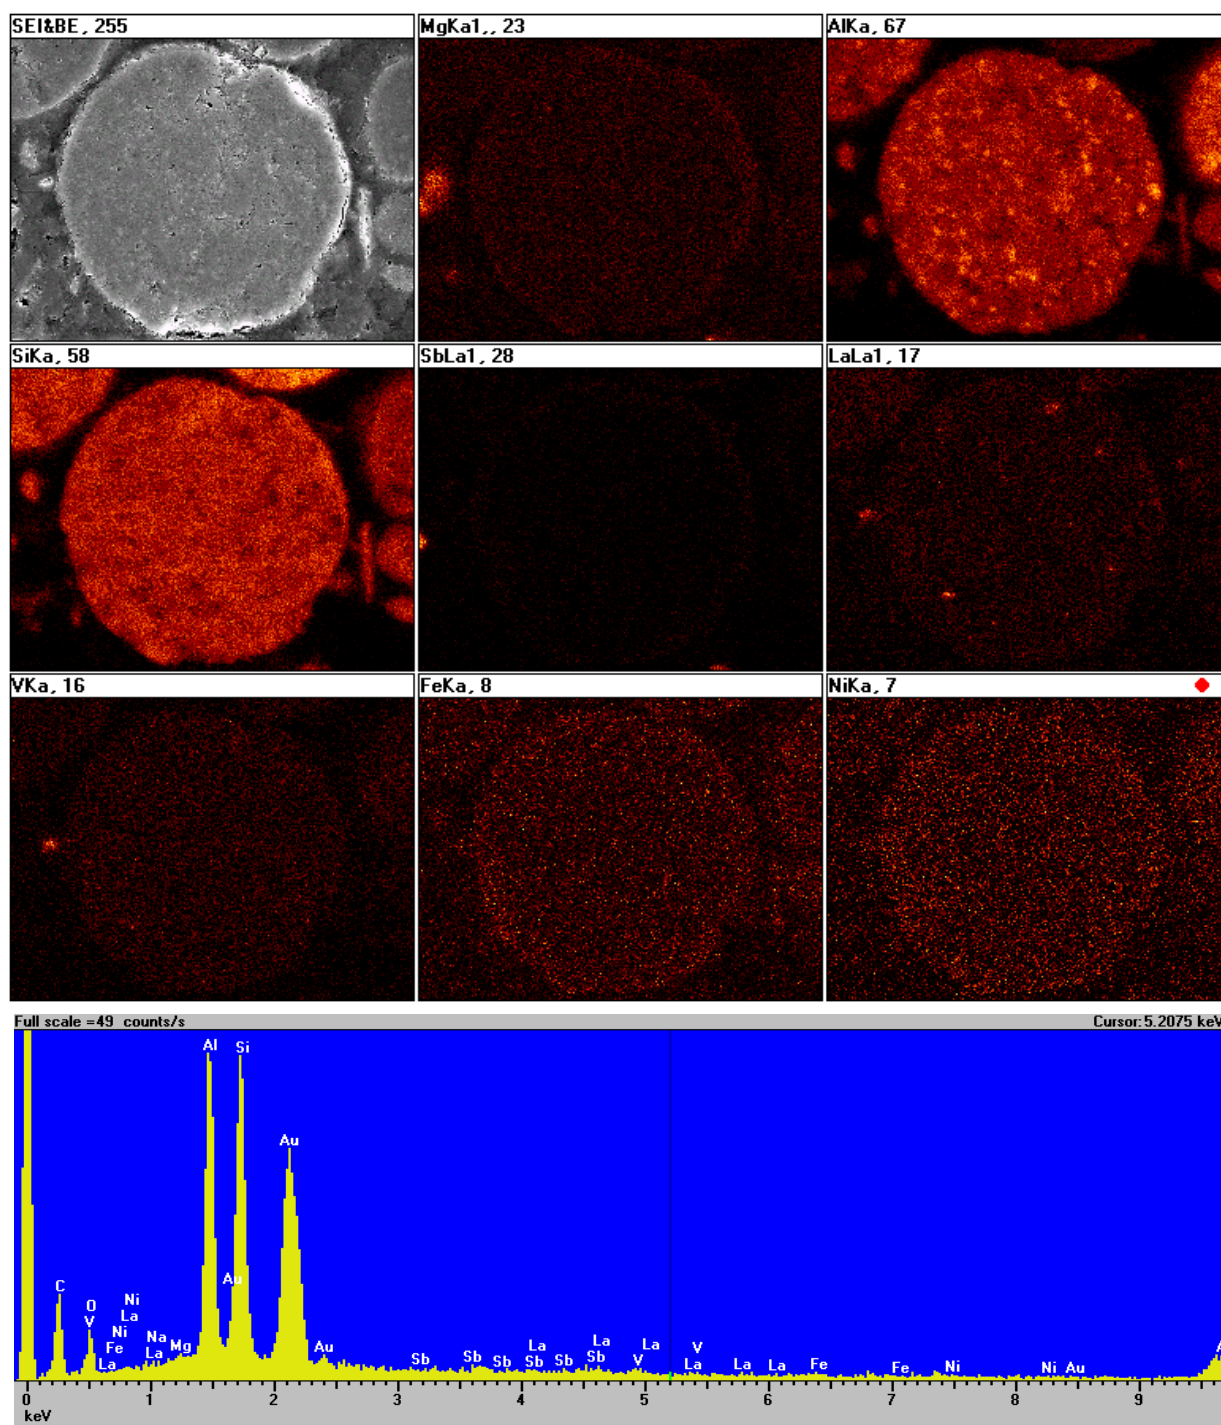

**Figure S10.** SEM image and EDS elemental mapping of equilibrium FCC catalyst: B-CAT-2M (4327 ppm Ni)

### Temperature programmed reduction with $H_2$ (TPR- $H_2$ )

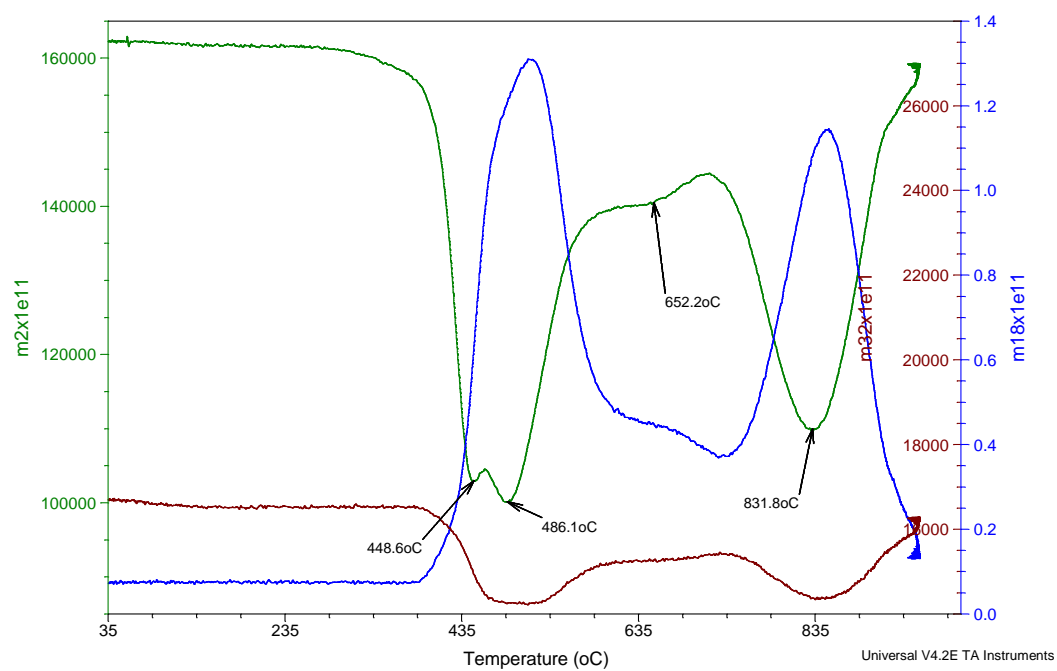

**Figure S11.** TPR- $H_2$  profile of  $Al_2O_3$ -CH-Ni-oc-7 sample containing 200,000 ppm Ni

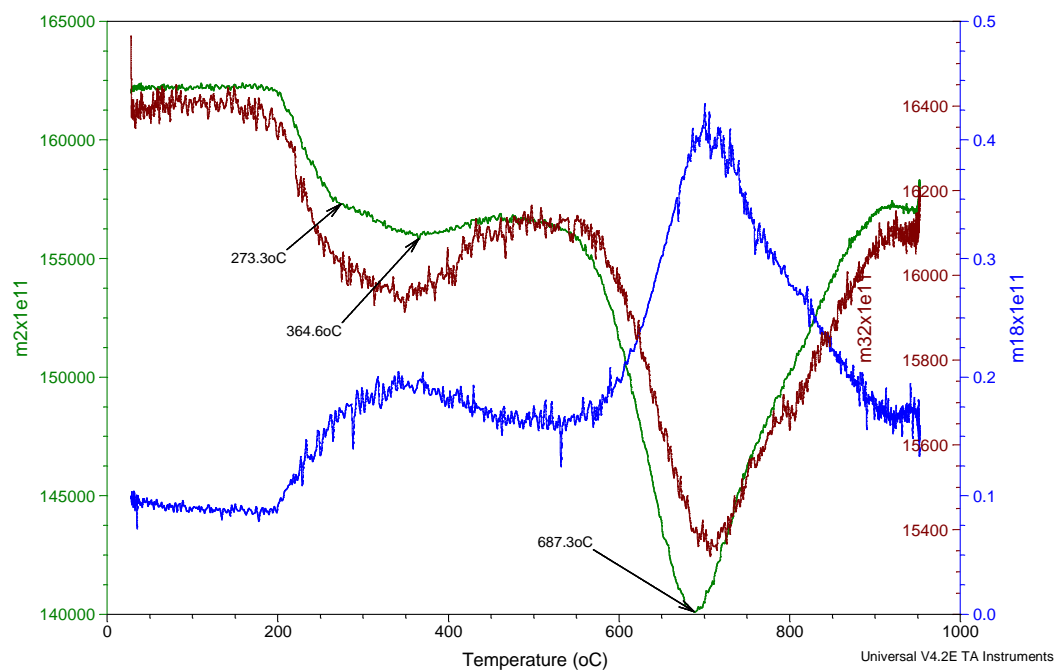

**Figure S12.** TPR- $H_2$  profile of USY-CH-Ni-oc-7 sample containing 50,000 ppm Ni
